# Supplementary material for: Serological and virological characterization of hepatitis B surface antigen-positive patients with or without Helicobacter pylori co-infection at the University of Gondar Comprehensive Specialized Hospital, Northwest Ethiopia
Source: Research Square preprint supplement (doi:10.21203/rs.3.rs-6220460/v1), 2025-05-06
Supplement: Supplementary file 1 [file 507ae0071538bc0b33ce2ffd.docx]

**Annex III: Data collection tools (Questionnaires)**

**Participant’s code_**_________________ MRN_____________ Ward_________

**Part I: Demographic and behavioral variables**

| S. No | Variables | Response | Remark |
| --- | --- | --- | --- |
| 1 | Age | _____________Years |  |
| 2 | Sex | 1. Male 2. Female |  |
| 3 | Residence | 1. Urban 2.Rural |  |
| 4 | Marital status | 1. Single 3. Widowed 2. Married 4. Divorced |  |
| 5 | Income | __________ETB/month |  |
| 6 | Educational status | 1. Unable to read and write  2. Able to read and write  3. Primary school  4. Secondary school  5. College and above |  |
| 7 | Occupation | 1. Housewife 2. Merchant  3. Farmer 4. Employee  5. Student 6. Daily laborer |  |
| 8 | Smoking status | 1. Yes 2. No |  |
| 9 | Alcohol use | 1. Yes 2. No |  |

**Part II: Clinical characteristics of study participants**

**Table 1: Clinical variables**

| S. No | Variables | Response | Remark |
| --- | --- | --- | --- |
| 1 | Height | ______________Meters |  |
| 2 | Weight | ______________Kg |  |
| 3 | Other chronic illness |  |  |
| 4 | CLD complications | Cirrhosis 1. Yes 2. No  Hepatic decompensation  1. Yes 2. No  Ascites 1. Yes 2. No  Portal hypertension  1. Yes 2. No  Variceal bleeding  1. Yes 2. No  HCC 1. Yes 2. No |  |
| 6 | Traditional medicine usage | 1. Yes 2. No |  |
| 7 | Treatment status | 1. Naive  2. TDF Experienced |  |

Data collector’s name_____________________________ Sign____________ Date

Supervisor’s name________________________________ Sign____________ Date
